# Supplementary material for: C. elegans—An Emerging Model to Study Metal-Induced RAGE-Related Pathologies
Source: Int J Environ Res Public Health. 2018 Jul 4;15(7):1407. doi: 10.3390/ijerph15071407 (PMC6069300; doi:10.3390/ijerph15071407)
Supplement: Supplementary file 1 [file ijerph-15-01407-s001.pdf]

**Table S1.** The effects of metal toxicity on RAGE expression.

| <b>Metal</b> | <b>Model</b>                    | <b>Exposure</b>                                       | <b>Behavior</b>                                                                                      | <b>Molecular</b>                                                                                        | <b>Reference</b> |
|--------------|---------------------------------|-------------------------------------------------------|------------------------------------------------------------------------------------------------------|---------------------------------------------------------------------------------------------------------|------------------|
| MeHg         | Rat                             | Prenatal                                              | decreased exploration behavior; increased anxiety-like behavior; impaired short and long-term memory | hippocampal decrease in RAGE expression                                                                 | [1]              |
| MeHg         | Rat                             | Chronic                                               |                                                                                                      | increased levels of hippocampal A $\beta$ ; increased levels of RAGE in the brain capillary endothelium | [2]              |
| Selenium     | Rat model of diabetes           | Chronic                                               |                                                                                                      | downregulation of NF-kB and RAGE expression; reduced diabetes-related inflammation                      | [3]              |
| Zinc         | Bovine aortic endothelial cells | Exposure to AGEs followed by treatment with zinc      |                                                                                                      | significant decrease in NF-kB activation and RAGE expression                                            | [4]              |
| Manganese    | Bovine aortic endothelial cells | Exposure to AGEs followed by treatment with manganese |                                                                                                      | downregulation of NF-kB expression and nuclear translocation                                            | [4]              |
| Arsenic      | Mice                            | Chronic                                               |                                                                                                      | decrease in RAGE expression                                                                             | [5]              |
| Arsenic      | Human                           | None; sample evaluation                               |                                                                                                      | higher urinary arsenic concentrations correlated with lower levels of RAGE expression in sputum samples | [5]              |

1. Heimfarth, L.; Delgado, J.; Mignori, M.R.; Gelain, D.P.; Moreira, J.C.F.; Pessoa-Pureur, R. Developmental neurotoxicity of the hippocampus following in utero exposure to methylmercury: Impairment in cell signaling. *Arch. Toxicol.* **2018**, *92*, 513–527.
2. Kim, D.K.; Park, J.D.; Choi, B.S. Mercury-induced amyloid-beta (abeta) accumulation in the brain is mediated by disruption of abeta transport. *J. Toxicol. Sci.* **2014**, *39*, 625–635.
3. Pillai, S.S.; Sugathan, J.K.; Indira, M. Selenium downregulates rage and nfkappab expression in diabetic rats. *Biol. Trace Elem. Res.* **2012**, *149*, 71–77.
4. Zhuang, X.; Pang, X.; Zhang, W.; Wu, W.; Zhao, J.; Yang, H.; Qu, W. Effects of zinc and manganese on advanced glycation end products (ages) formation and ages-mediated endothelial cell dysfunction. *Life Sci.* **2012**, *90*, 131–139.
5. Lantz, R.C.; Lynch, B.J.; Boitano, S.; Poplin, G.S.; Littau, S.; Tsapralis, G.; Burgess, J.L. Pulmonary biomarkers based on alterations in protein expression after exposure to arsenic. *Environ. Health Perspect.* **2007**, *115*, 586–591.
